# Supplementary material for: Comorbidities of epilepsy in low and middle-income countries: systematic review and meta-analysis
Source: PubMed Central journal article supplement (PMC7265529; doi:10.1038/s41598-020-65768-6), 2020-06-02
Supplement: 41598_2020_65768_MOESM1_ESM.pdf [file 41598_2020_65768_MOESM1_ESM.pdf]

**Comorbidities of epilepsy in low and middle-income countries: systematic review and meta-analysis**

Aline Muhigwa<sup>1,2\*</sup> • Pierre-Marie Preux<sup>1</sup> • Daniel Gérard<sup>1</sup> • Benoit Marin<sup>1</sup> • Farid Boumediène<sup>1</sup> • Charles Ntamwira<sup>2</sup>

Chung-Huang Tsai<sup>3</sup>

Supplementary Table 1: Proportion of psychosocial comorbidities in LMICs

| <b>Author</b>                                  | <b>Country</b>                          | <b>year</b> | <b>n PWE</b> | <b>Mar Discr. %</b> | <b>Job Discr. %</b> |
|------------------------------------------------|-----------------------------------------|-------------|--------------|---------------------|---------------------|
| <b>Crepin et al.<sup>97</sup></b>              | Benin                                   | 2007        | 131          | -                   | 37.4                |
| <b>Prischich et al.<sup>98</sup></b>           | Cameroon                                | 2004        | 18           | 88.9                | 16.7                |
| <b>Kariuki et al.<sup>99</sup></b>             | Tanzania, Kenya,<br>Ghana, South Africa | 2014        | 2170         | 44.6                | 29.8                |
| <b>Kariuki et al.<sup>95</sup></b>             | Tanzania, Kenya,<br>Ghana, South Africa | 2015        | -            | -                   | 78.0                |
| <b>Kariuki et al.<sup>95</sup></b>             | Tanzania, Kenya,<br>Ghana, South Africa | 2015        | 1426         | 77.0                | -                   |
| <b>Rwiza et al.<sup>99</sup></b>               | Tanzania                                | 1993        | 203          | 62.1                | -                   |
| <b>Matuja et al.<sup>100</sup></b>             | Tanzania                                | 2001        | 174          | 78.9                | -                   |
| <b>Ibinga et al.<sup>101</sup></b>             | Gabon                                   | 2015        | 83           |                     | 21.4                |
| <b>Bernet-Bernady<br/>et al.<sup>102</sup></b> | CAR                                     | 1997        | 187          | 79.1                | -                   |
| <b>Stefanello et<br/>al.<sup>103</sup></b>     | Brazil                                  | 2010        | 153          | 49.0                | 7.4                 |
| <b>Montano et al.<sup>104</sup></b>            | Peru                                    | 2005        | 29           | 79.1                | 21.4                |

Mar Discr: Marriage discrimination

Job Discr: Job discrimination

PWE: people with epilepsy

CAR:Central African Republic

Supplementary Table 2: Proportion of perinatal events in LMICs

| Author                           | Country      | Year | N      | n PWE | PT   | PI  | PNA  | DP   |
|----------------------------------|--------------|------|--------|-------|------|-----|------|------|
| Osuntokun et al. <sup>103</sup>  | Nigeria      | 1987 | 18954  | 101   | 2.0  | -   | -    | -    |
| Goudsmit et al. <sup>104</sup>   | Liberia      | 1983 | 44436  | 123   | 3.0  | -   | -    | -    |
| Debouverie et al. <sup>108</sup> | Burkina-Faso | 1993 | 16627  | -     | 10.0 | -   | -    | -    |
| Kariuki et al. <sup>113</sup>    | South Africa | 2014 | 584586 | 2170  | 5.6  | -   | -    | -    |
| Ngugi et al. <sup>2</sup>        | South Africa | 2013 | 2262   | 971   | 5.8  | -   | 12.1 | 14.8 |
| Burton et al. <sup>96</sup>      | Tanzania     | 2011 | 225    | 112   |      | -   | 14.3 | -    |
| Rwiza et al. <sup>99</sup>       | Tanzania     | 1992 | 18183  | 207   | 1.0  | -   | -    | -    |
| Matuja et al. <sup>100</sup>     | Tanzania     | 2001 | 348    | 174   |      | -   | 12.1 | -    |
| Haimanot et al. <sup>111</sup>   | Ethiopia     | 1997 | 61686  | 139   | 1.4  | -   | -    | -    |
| Wagner et al. <sup>93</sup>      | South Africa | 2014 | 552    | 292   | 5.0  | -   | -    | -    |
| Chen et al. <sup>112</sup>       | Taiwan       | 2006 | 13663  | 37    | 5.4  | -   | -    | -    |
| Hackett et al. <sup>108</sup>    | India        | 1997 | 365    | 365   | 8.4  | 7.5 | -    | -    |
| Sampaio et al. <sup>109</sup>    | Brazil       | 2009 | 22013  | 94    | -    | -   | 18.8 | -    |
| Velez et al. <sup>114</sup>      | Colombia     | 2006 | 8910   | 92    | -    | -   | 8.6  | -    |
| Medina et al. <sup>110</sup>     | Honduras     | 2005 | 6473   | 90    | 7.8  | -   | -    | -    |
| Sampaio et al. <sup>109</sup>    | Brazil       | 2009 | 22013  | 94    | -    | 1.9 | -    | -    |

PWE: people with epilepsy

PT: perinatal traumas

PI: perinatal infections

PNA: perinatal and neonatal asphyxia

DP: difficult pregnancies
